# Supplementary material for: Biomimetic triblock copolymer membranes: from aqueous solutions to solid supports
Source: Royal Society of Chemistry journal article supplement (doi:10.1039/c0sm00711k), 2010-12-06

## Supporting information

### Biomimetic Triblock Copolymer Membranes: From aqueous solutions to solid supports

Alfredo González-Pérez <sup>a),\*</sup>, Valeria Castelletto <sup>b)</sup>, Ian W Hamley <sup>b)</sup>, Pablo Taboada <sup>c)</sup>

a) Membrane Biophysics Group, Niels Bohr Institute, University of Copenhagen,  
Blegdamsvej 17, 2100 Copenhagen Ø / Denmark

b) School of Chemistry, Food Science and Pharmacy, University of Reading,  
Whiteknights, Reading RG6 6AD, UK

c) Condensed Matter Physics Department, Faculty of Physics, 15782 Campus sur,  
University of Santiago de Compostela, Santiago de Compostela, Spain

**Figure X1.** Calibration of the AFM set-up with a standard grid

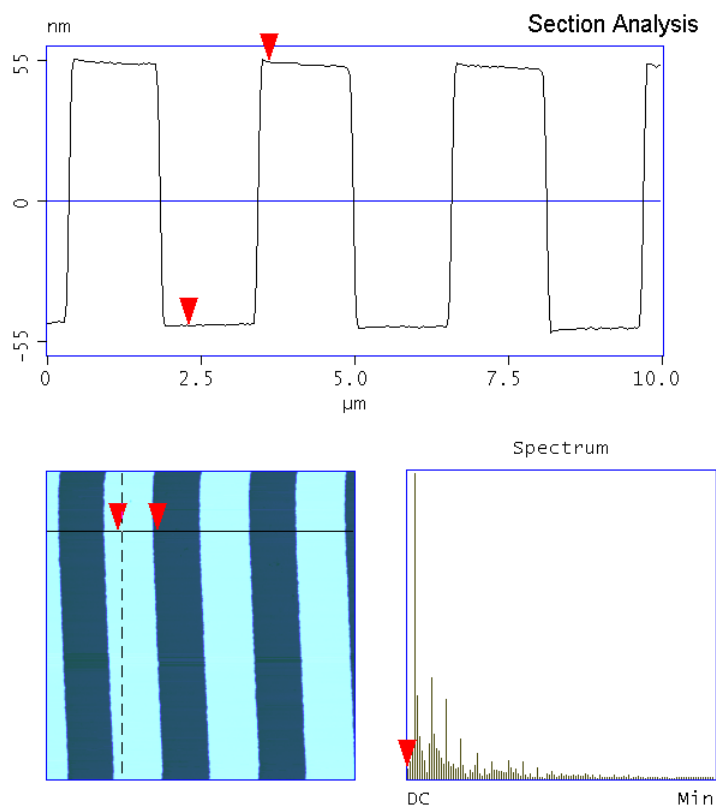

**Figure X2.** Detail of membrane thickness of the ABA block copolymer layer deposited onto solid glass support.

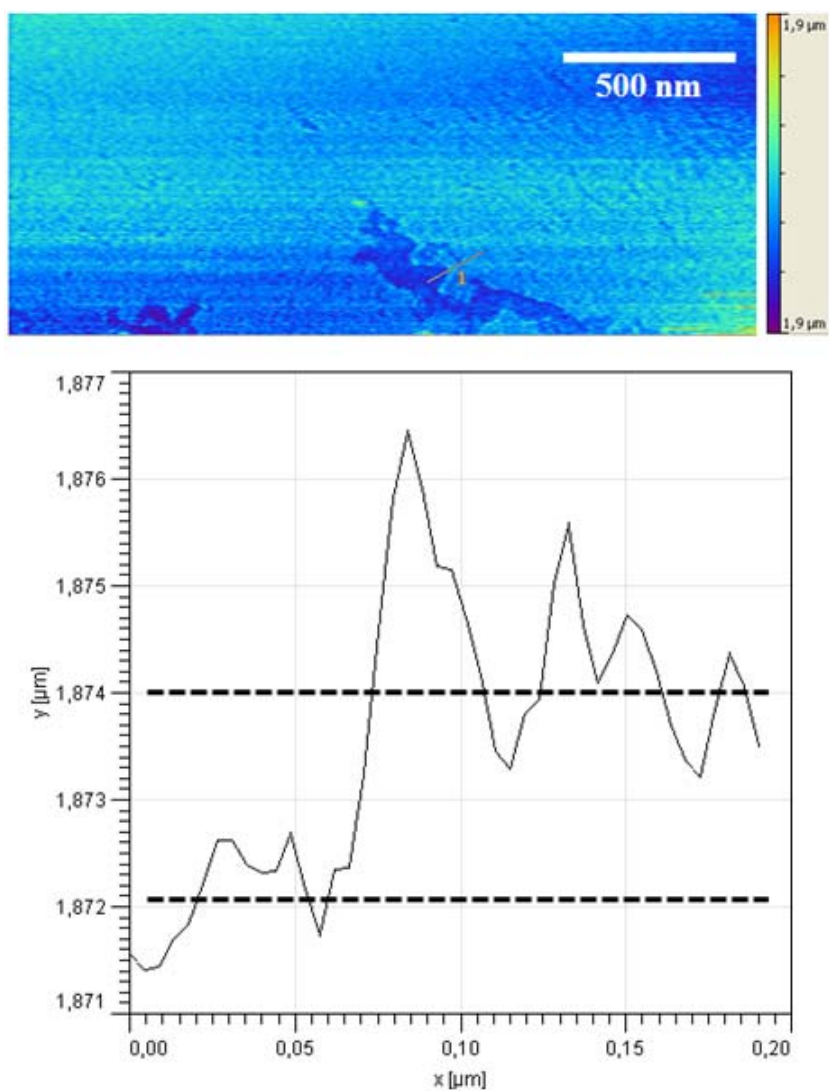

**Figure X3.** Different regions of the (a) block copolymer membrane and (b) clean mica used for the determination of their mean roughness. In (a) 0.108 nm, polymer membrane, and (b) 0.571 nm, mica.

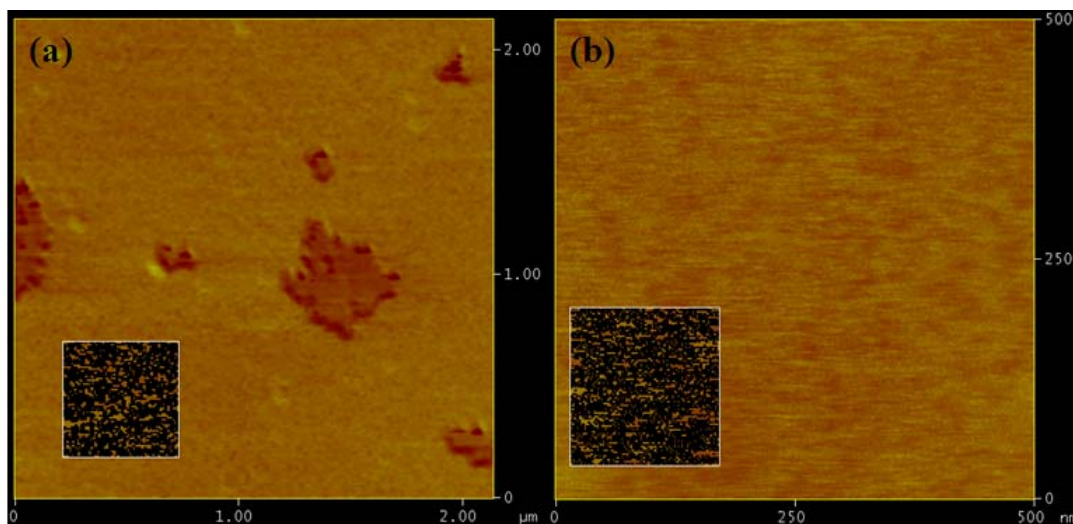

Supplement: c0sm00711k.pdf [file c0sm00711k.pdf]
